# Supplementary material for: Metagenomic Analysis Reveals Three Novel and Prevalent Mosquito Viruses from a Single Pool of Aedes vexans nipponii Collected in the Republic of Korea
Source: MDPI journal article supplement (doi:10.3390/v11030222), 2019-03-05
Supplement: s1 [file s1]

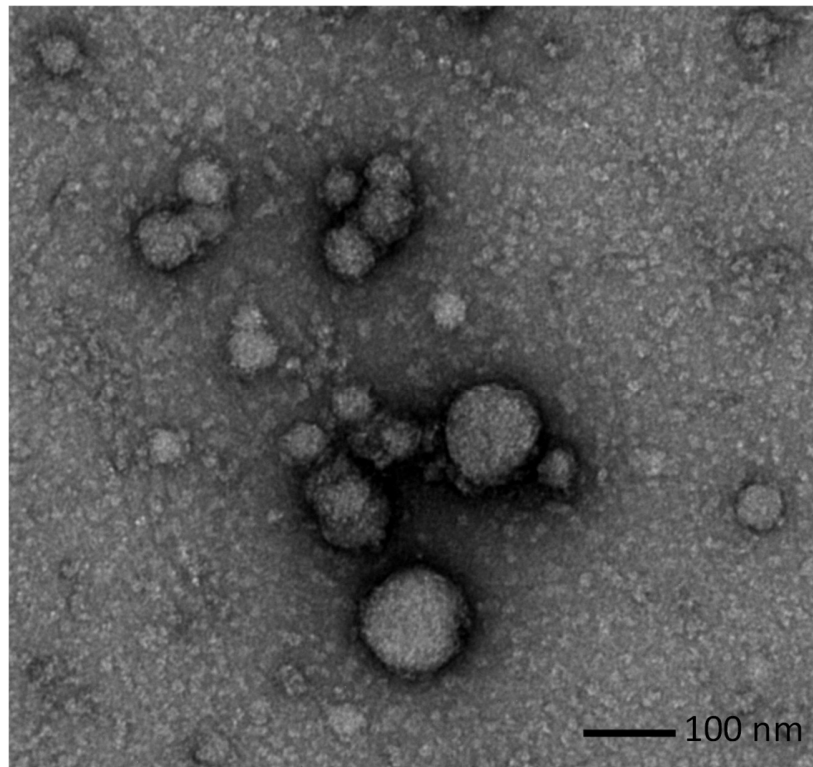

**Figure S1.** Negative stained electron microscopy image of ultrafiltration concentrated homogenate supernatant from mosquito pool 16-0052. A scale of 100 nm is indicated by the black bar.

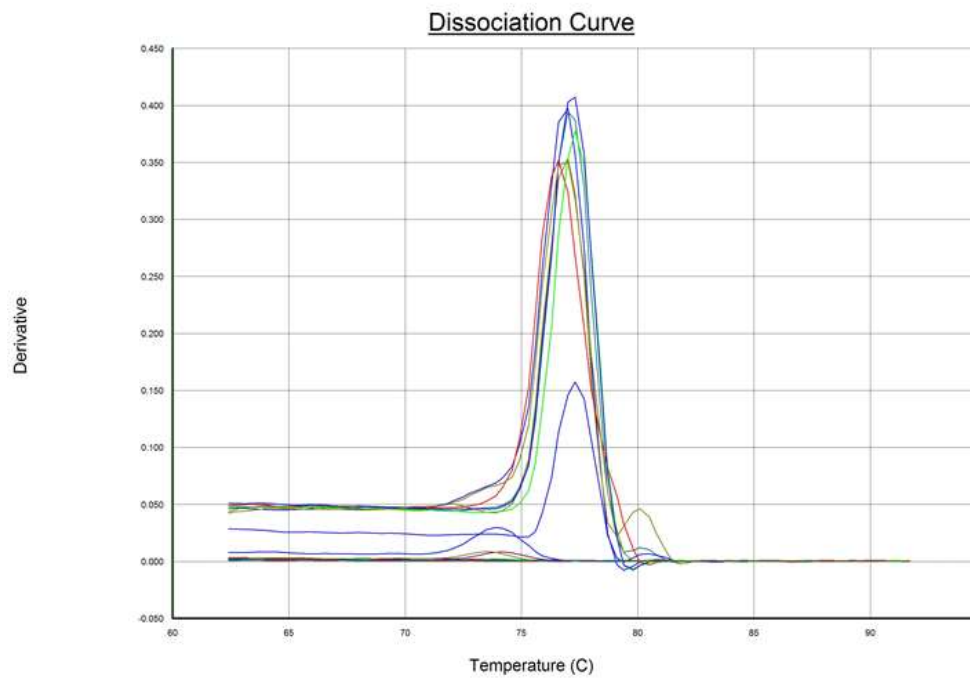

**Figure S2.** Melting curve analysis of YBV1 qRT-PCR amplicons from 20 total reactions (8 positive/12 negative). Positive samples are represented by a melting point temperature of around 77 °C and negative samples are represented by mostly flat lines.

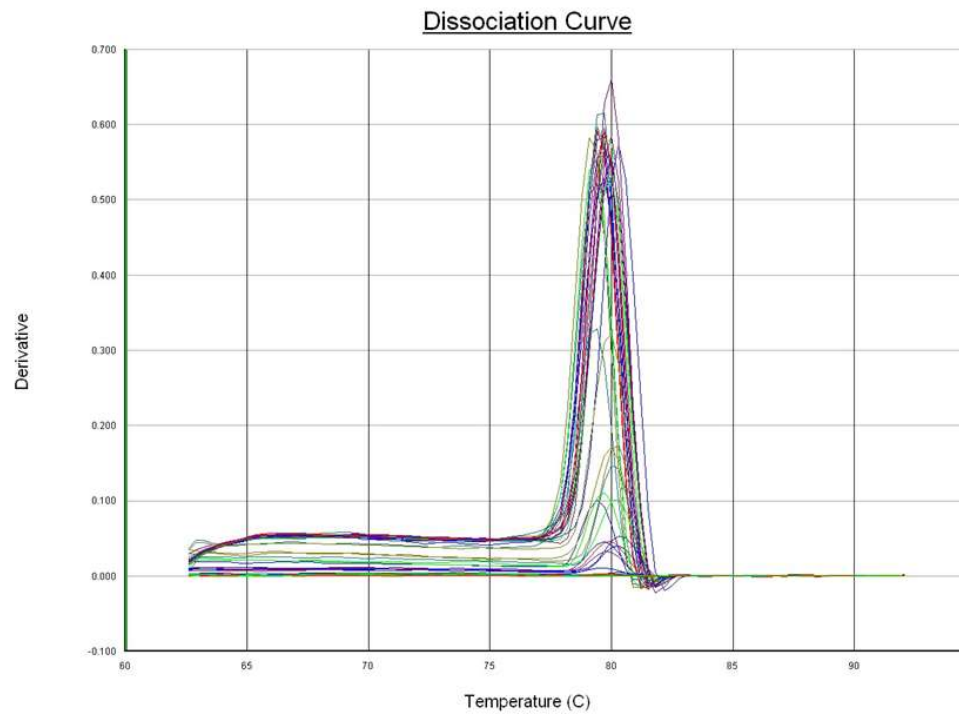

**Figure S3.** Melting curve analysis of YSLV1 qRT-PCR amplicons from 92 total reactions (38 positive/54 negative). Positive samples are represented by a melting point temperature of around 79 °C and negative samples are represented by mostly flat lines.
